# Supplementary material for: A comprehensive investigation of the differential interaction of human serum albumin with gold nanoparticles based on the variation in morphology and surface functionalization
Source: Royal Society of Chemistry journal article supplement (doi:10.1039/c6ra10506h), 2016-01-01
Supplement: c6ra10506h1.pdf [file c6ra10506h1.pdf]

**A comprehensive investigation of the differential interaction of  
Human Serum Albumin with Gold nanoparticles based on the  
variation in morphology and surface functionalization**

Sruthi Ann Alex, Debolina Chakraborty, N. Chandrasekaran, Amitava Mukherjee\*

Centre for Nanobiotechnology, VIT University, Vellore, India.

**Supplementary Information**

**\*Corresponding author**

**Dr. Amitava Mukherjee**

**Senior Professor & Deputy Director**

**Centre for Nanobiotechnology**

**VIT University, Vellore - 632014**

**Email: [amit.mookerjea@gmail.com](mailto:amit.mookerjea@gmail.com)**

**Phone: 91 416 2202620**

**Fax: 91-416-2243092**

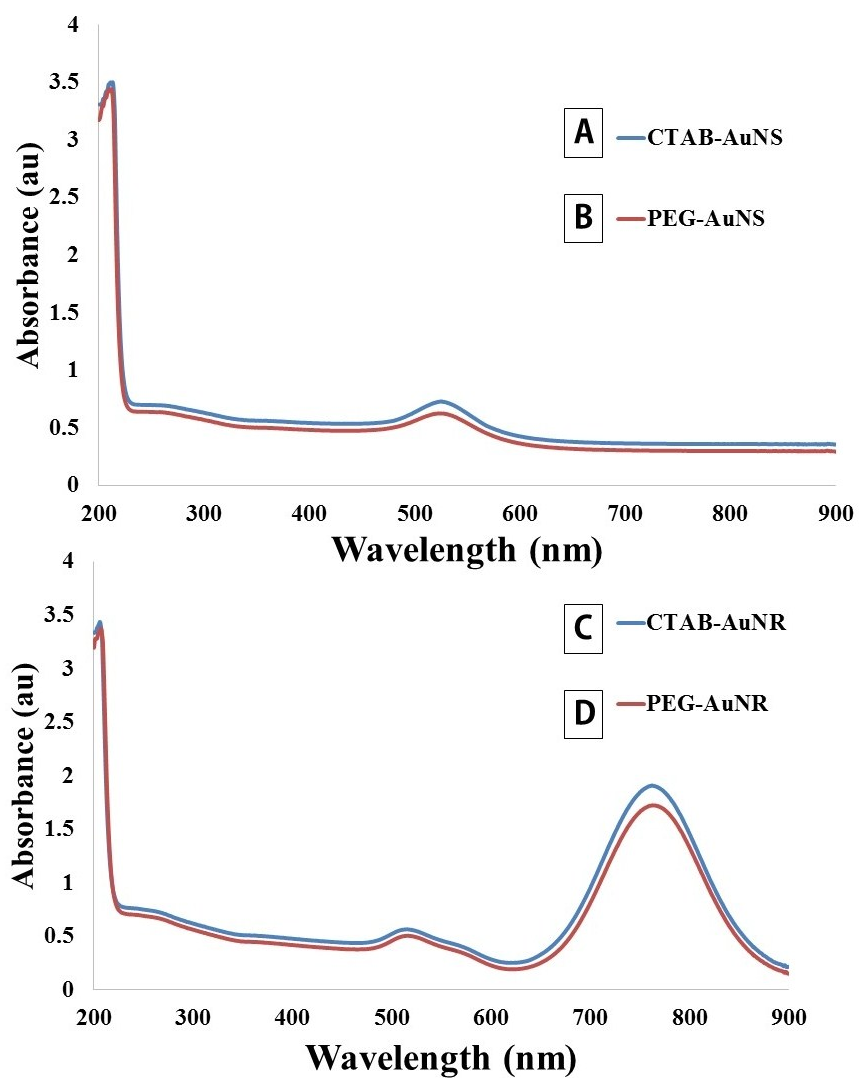

**Figure S1** UV-visible spectra of (A) CTAB-AuNSs (B) PEG-AuNSs (C) CTAB-AuNRs (D) PEG-AuNRs.

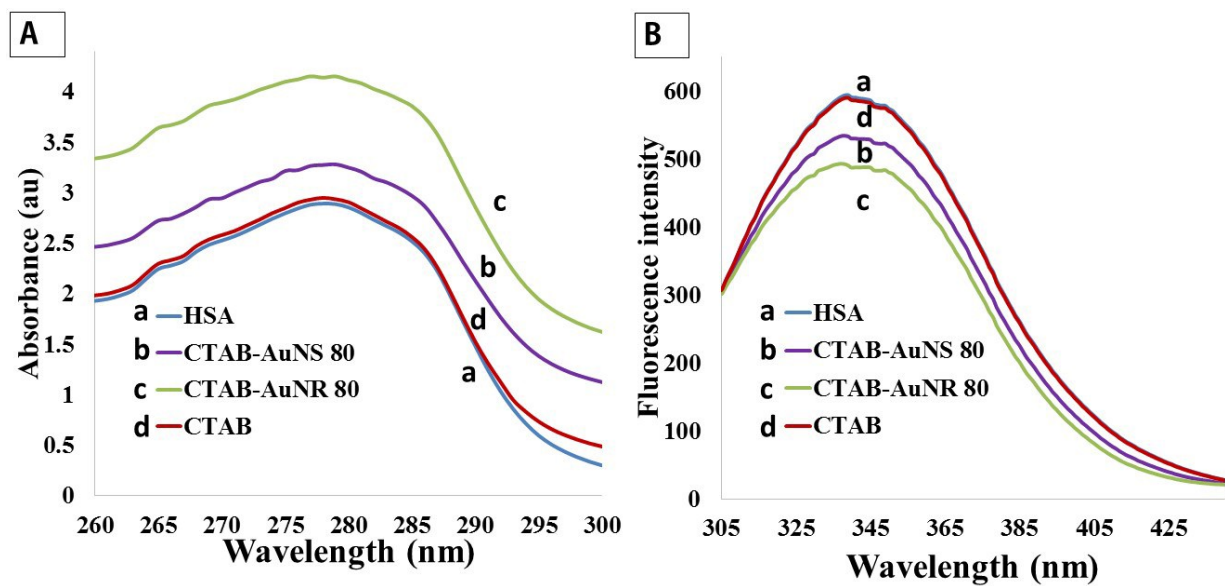

**Figure S2 (A)** UV-visible and **(B)** Fluorescence spectra for (a) HSA (b) HSA+CTAB-AuNSs 80  $\mu$ M (c) HSA+CTAB-AuNRs 80  $\mu$ M (d) CTAB

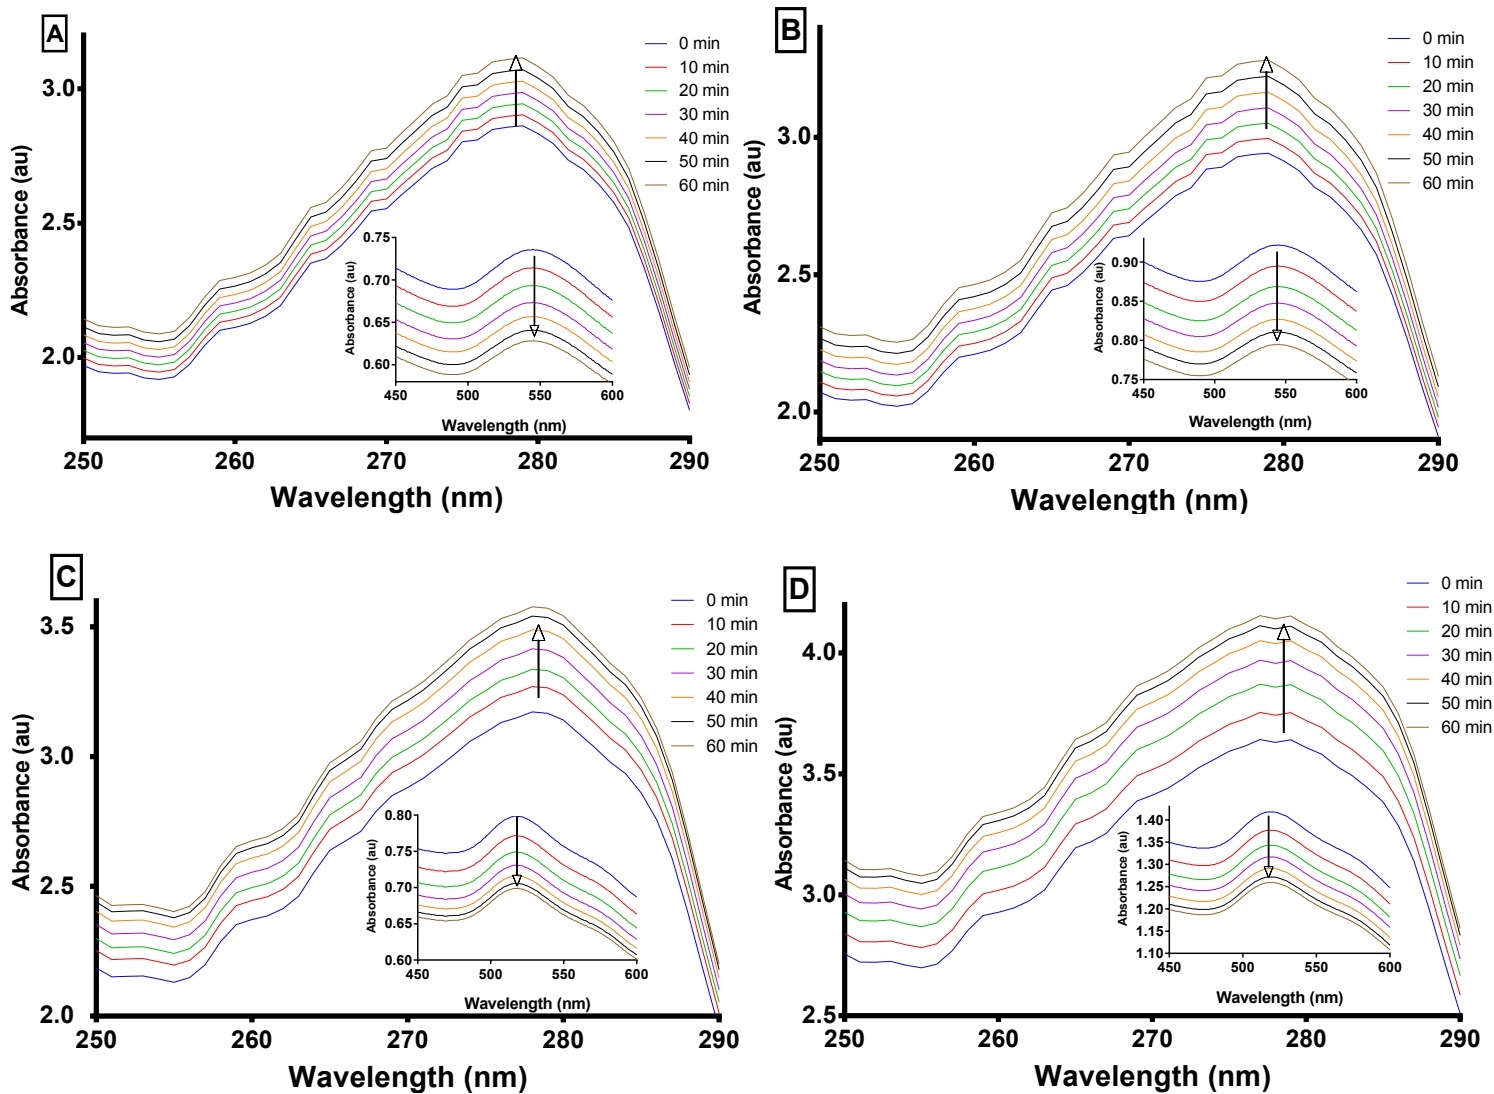

**Figure S3** UV-visible spectra for (A) HSA+CTAB-AuNPs 40  $\mu$ M (B) HSA+CTAB-AuNPs 80  $\mu$ M (C) HSA+CTAB-AuNRs 40  $\mu$ M (d) HSA+CTAB-AuNRs 80  $\mu$ M (Main spectra shows increase in HSA peak; Inset shows decrease in AuNP peak upon nanoparticle consumption for complex formation).

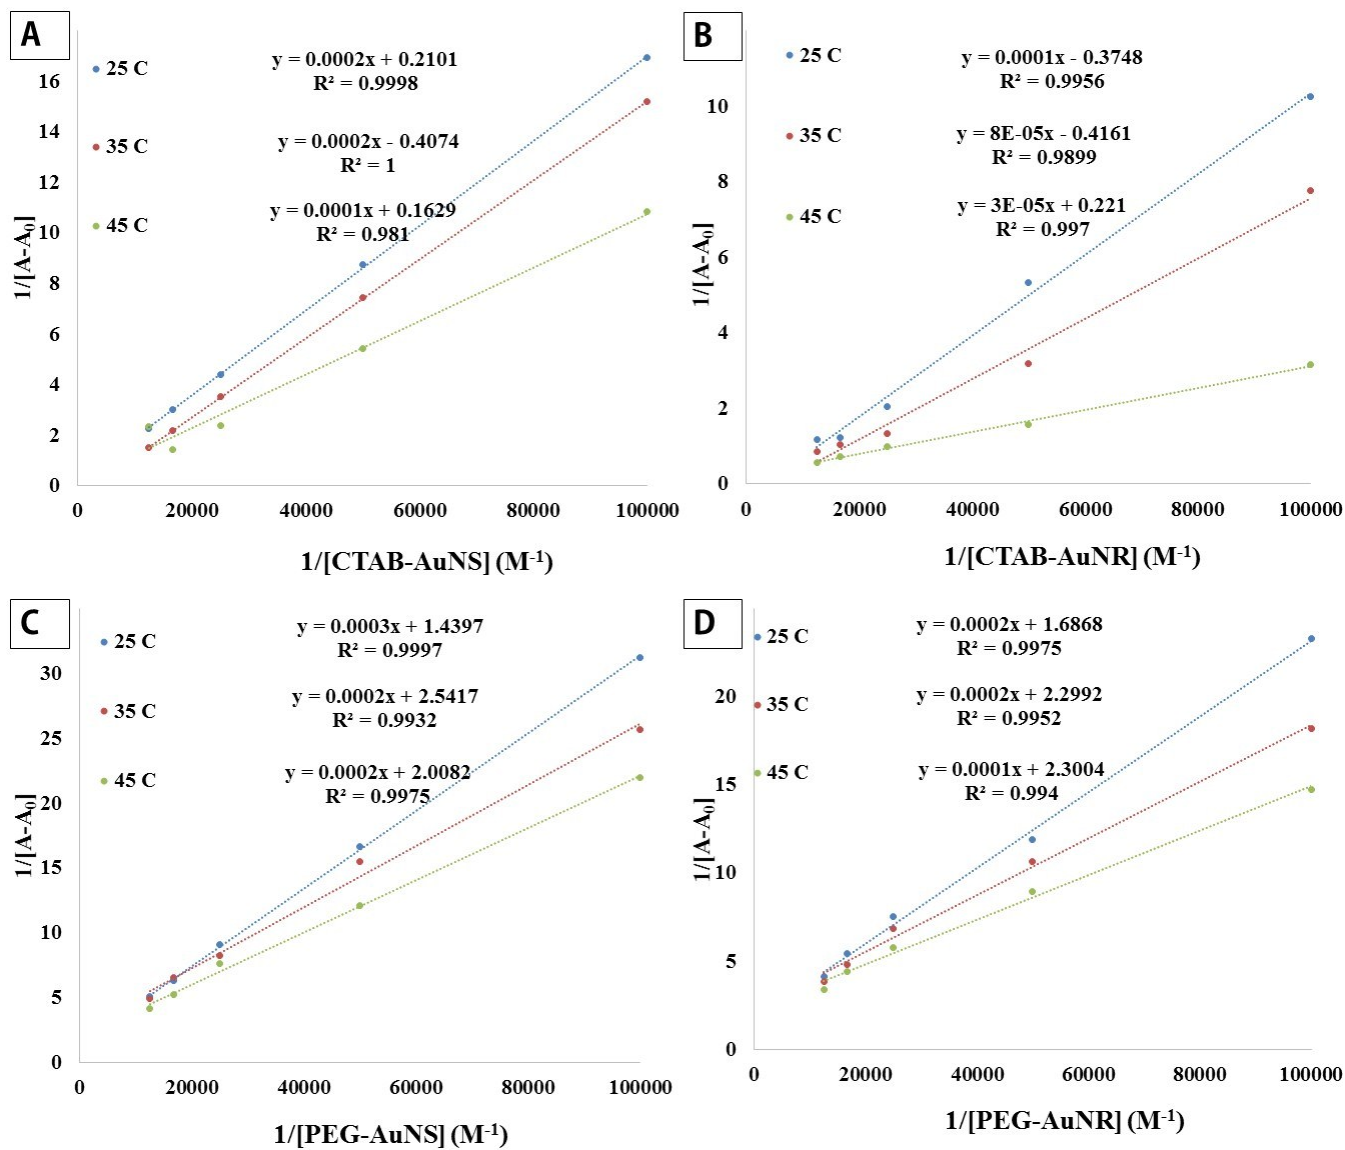

**Figure S4** Plot showing the inverse of  $A-A_0$  versus the inverse of nanoparticle concentration for (A) CTAB-AuNSs (B) CTAB-AuNRs (C) PEG-AuNSs (D) PEG-AuNRs.

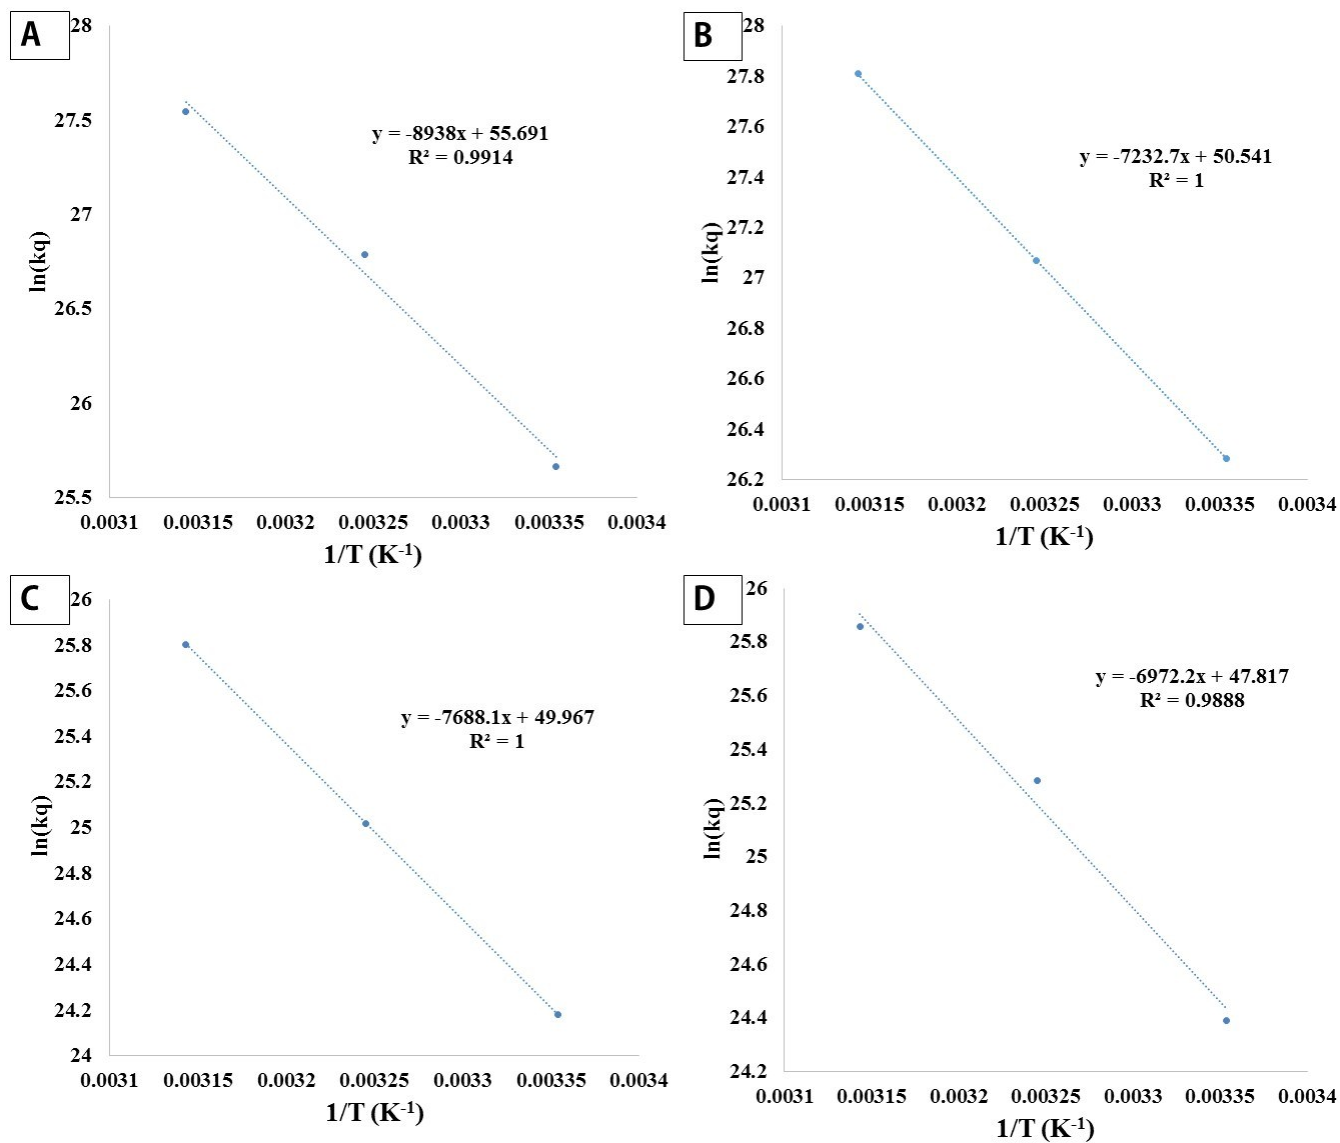

**Figure S5** Arrhenius plot for (A) CTAB-AuNSs (B) CTAB-AuNRs (C) PEG-AuNSs (D) PEG-AuNRs.

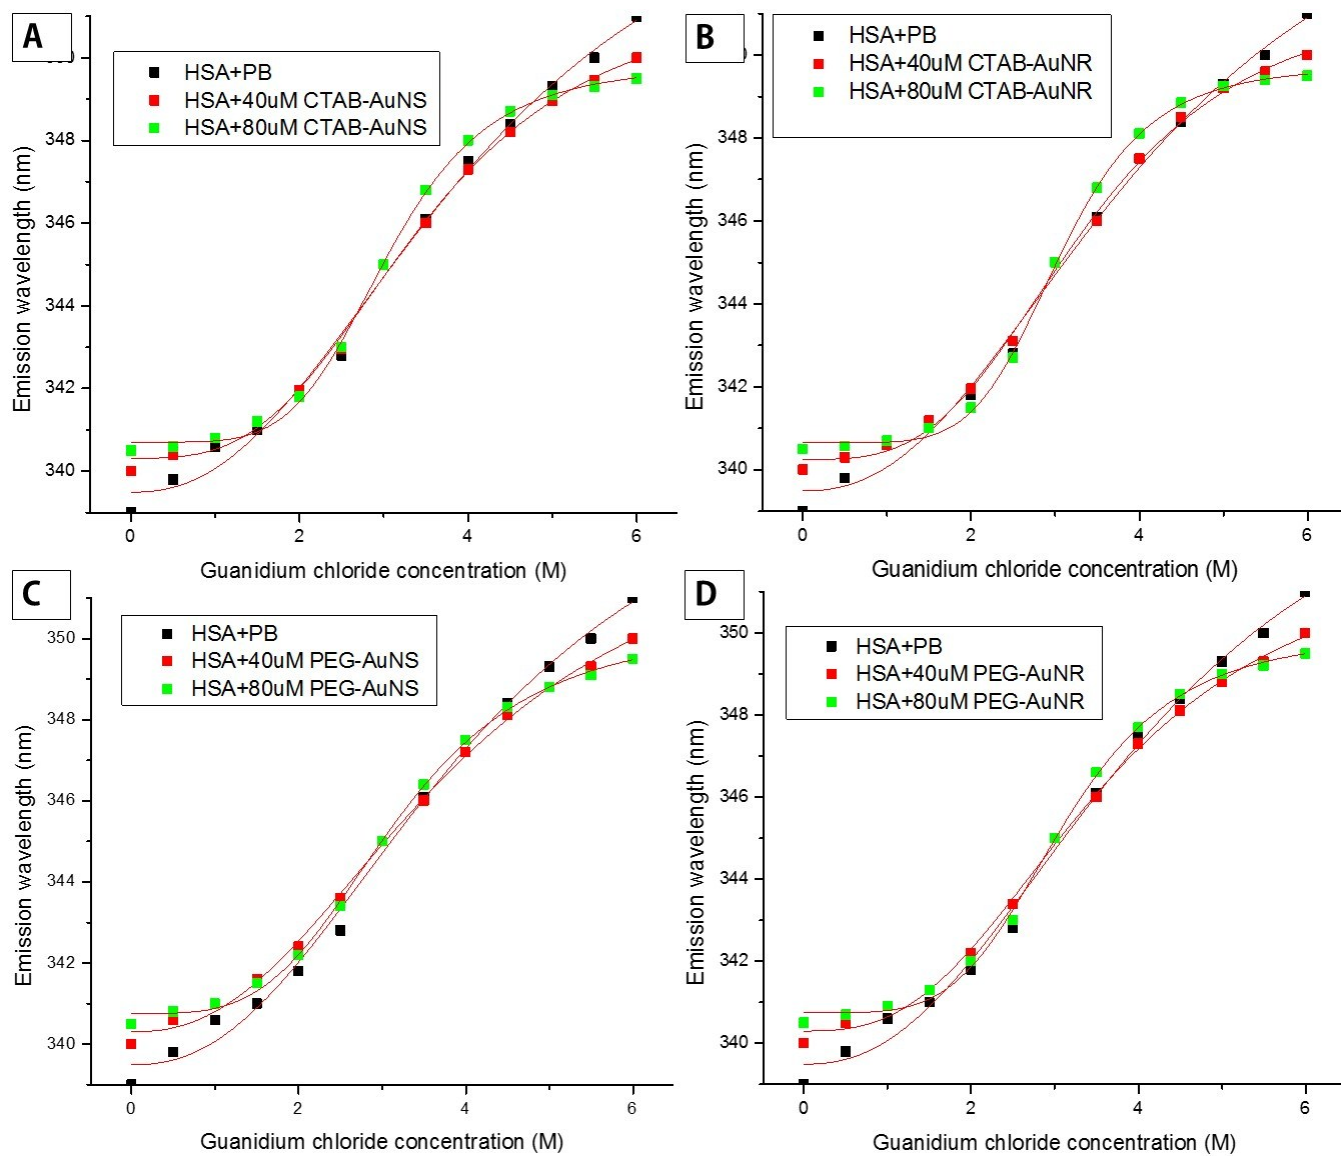

**Figure S6** Effect of denaturant concentration on the emission wavelength of HSA before and after interaction with (A) CTAB-AuNSs (B) CTAB-AuNRs (C) PEG-AuNSs (D) PEG-AuNRs at 0, 40, and 80  $\mu\text{M}$ .

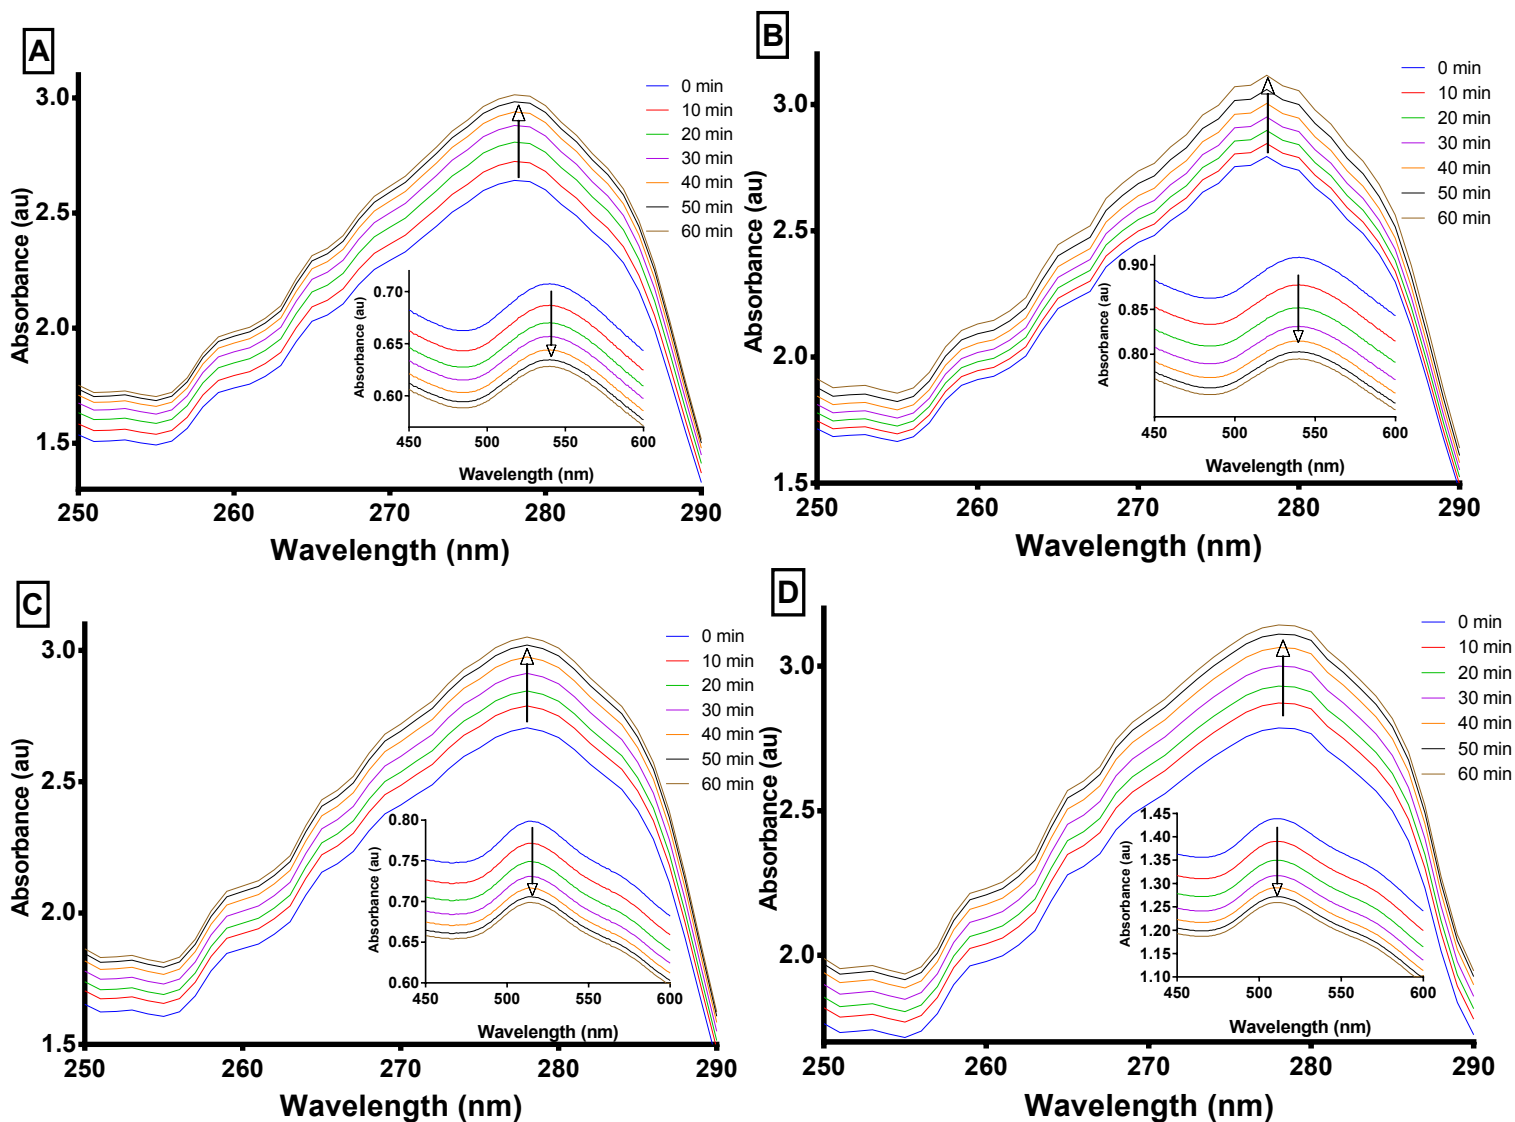

**Figure S7** UV-visible spectra for (A) PEG-AuNSs 40  $\mu$ M (B) PEG-AuNSs 80  $\mu$ M (C) PEG AuNRs 40  $\mu$ M (d) PEG-AuNRs 80  $\mu$ M (Main spectra shows increase in HSA peak; Inset shows decrease in AuNP peak upon nanoparticle consumption for complex formation).



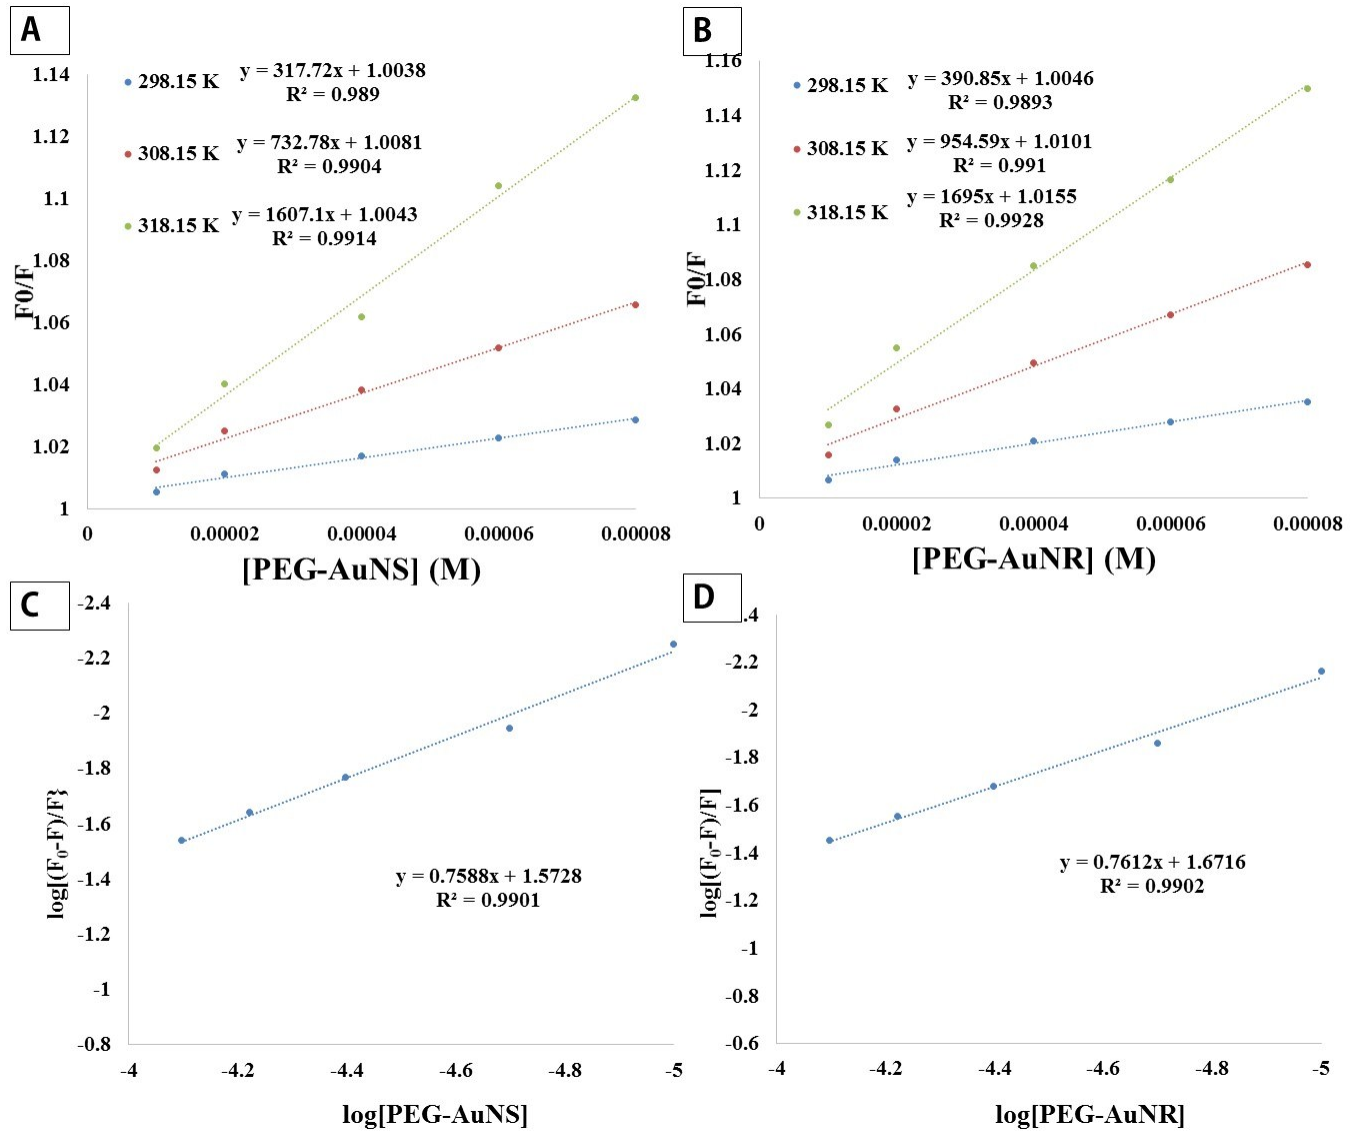

**Figure S8 (A–B)** Stern–Volmer plot (at 298, 308, and 318 K) and **(C–D)** double logarithmic plot (298 K) for HSA interacted with PEG-modified AuNSs and AuNRs.

**Table S1: Protein concentrations in interacted samples before and after centrifugation**

| <b>Sample</b> | <b>Reading 1<sup>a</sup> (μM)</b> | <b>Reading 2<sup>b</sup> (μM)</b> | <b>Reading 3<sup>c</sup> (μM)</b> | <b>Reading 4<sup>d</sup> (μM)</b> |
|---------------|-----------------------------------|-----------------------------------|-----------------------------------|-----------------------------------|
| HSA control   | 99.0±0.7                          | 93.3±1.7                          | 5.7±1.2                           | –                                 |
| CTAB AuNS 40  | 97.6±1.2                          | 72.1±0.7                          | 25.5±0.9                          | 19.7±1.9                          |
| CTAB AuNS 80  | 97.2±0.8                          | 70.7±0.4                          | 26.5±0.4                          | 20.8±1.3                          |
| CTAB AuNR 40  | 96.5±0.5                          | 70.3±1.0                          | 26.2±0.7                          | 20.5±0.8                          |
| CTAB AuNR 80  | 97.2±0.5                          | 66.8±0.8                          | 30.4±1.1                          | 24.7±1.2                          |
| PEG AuNS 40   | 99.3±0.4                          | 85.3±0.6                          | 14.0±0.6                          | 8.3±0.7                           |
| PEG AuNS 80   | 98.3±0.8                          | 84.6±0.5                          | 13.7±0.4                          | 7.9±1.4                           |
| PEG AuNR 40   | 98.1±0.4                          | 80.9±0.3                          | 17.2±0.3                          | 11.5±1.2                          |
| PEG AuNR 80   | 98.4±1.1                          | 80.2±0.5                          | 18.1±1.4                          | 12.4±1.1                          |

a – Protein concentrations estimated in 1-h interacted sample before centrifuge

b – Protein concentrations estimated for supernatant in 1-h interacted sample before centrifuge

c – Protein concentration in pellet (c=a–b)

d – Protein concentration estimated to be involved in complex formation (d=Reading 3 for sample – Reading 3 for control)
